# Supplementary material for: Immune Cells Are Differentially Modulated in the Heart and the Kidney during the Development of Cardiorenal Syndrome 3
Source: MDPI journal article supplement (doi:10.3390/cells12040605), 2023-02-13
Supplement: s1 [file s1]

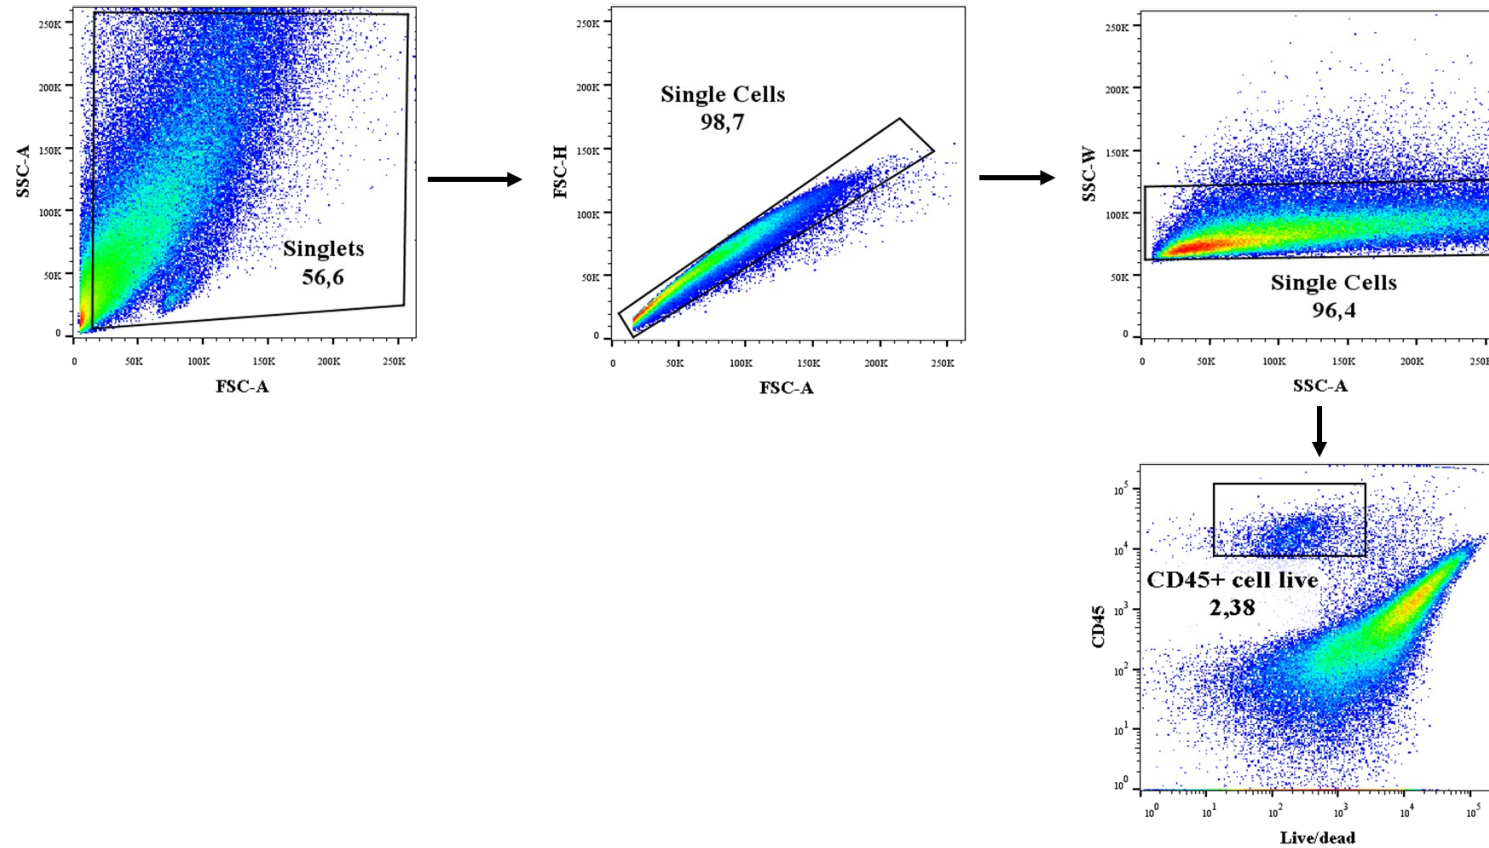

**Supplementary Figure S1:** Gate strategy used to exclude dead and doublets cells. Suspended cells from samples of the kidney and heart were gated on FSC-A and SSC-A, followed by FSC-H vs FSC-A and SSC-W vs SSC-A. After, based on the use of Live&dead kit and CD45 we identified live immune cells for the ones that were negative for live&dead and positive for CD45.
